# Supplementary material for: Sequential events during the quiescence to proliferation transition establish patterns of follicle cell differentiation in the Drosophila ovary
Source: Oxford University Press journal article supplement (doi:10.1242/bio.059625), 2022-12-16
Supplement: bio059625supp.pdf [file bio059625supp.pdf]

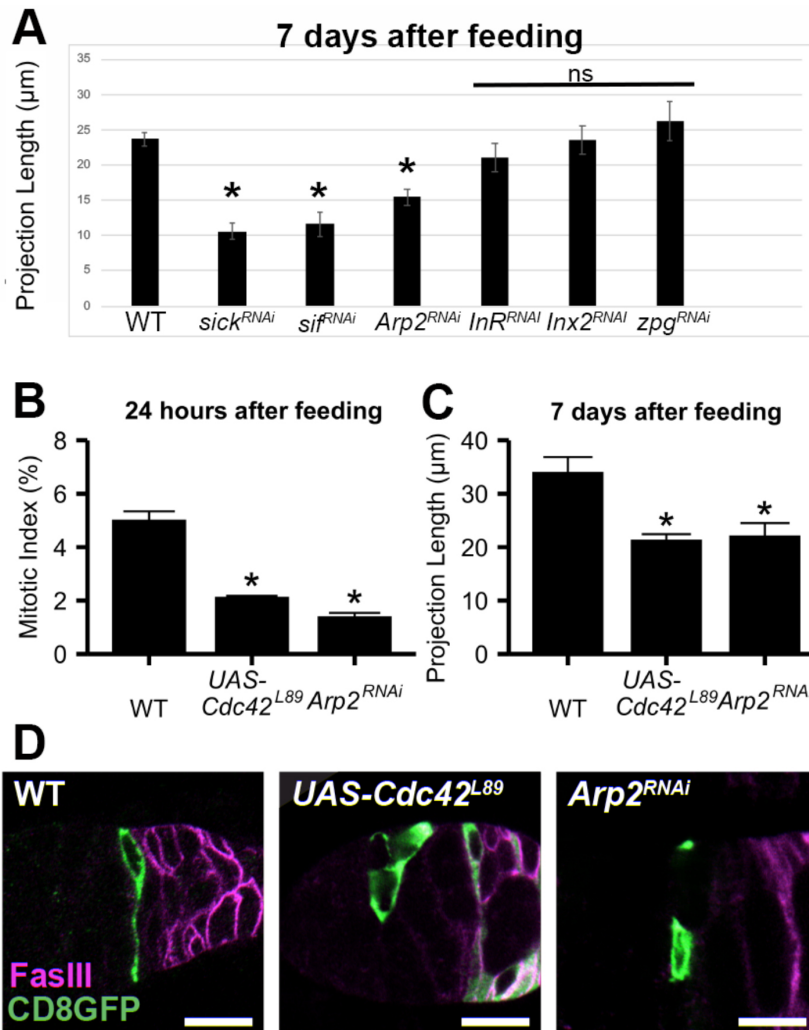

**Fig. S1. *arp2* and *cdc42* are required for proliferation and projection growth.** (A) Screen for regulators of projection length: average FSC projection length 7 days after re-feeding is indicated; (Ub-RFP, Gal80 FRT19A Flp122/FRT19A; 109-30-Gal4/UAS-transgene). \* $p < 0.0001$  vs. Ub-RFP, Gal80 FRT19A Flp122/FRT19A; 109-30-Gal4/+. Left to right:  $n = 12, 14, 9, 8, 4, 4$ . (B) Layer 2 FSC mitotic index (PH3+ FSC/total) in WT (109-30-Gal4TubGal80ts/+) versus RNAi knockdown or ectopic gene expression (109-30-Gal4 TubGal80ts/UAS-transgene). \* $p < 0.01$  vs. 109-30-TubGal80ts/+. Left to right:  $n = 538, 477, 357$ . (C) Average FSC projection length 7 days after re-feeding; (Ub-RFP, Gal80 FRT19A Flp122/FRT19A; 109-30-Gal4/UAS-transgene). \* $p < 0.01$  vs. Ub-RFP, Gal80 FRT19A Flp122/FRT19A; 109-30-Gal4/+. Left to right:  $n = 6, 6, 8$ . (D) CD8-GFP (green) marks FSCs and projections. FasIII (magenta) marks follicle cells (Ub-RFP, Gal80 FRT19A Flp122/FRT19A; 109-30-Gal4/UAS-transgene). Scale bars = 10  $\mu\text{m}$ . Plots indicate mean  $\pm$  SEM.

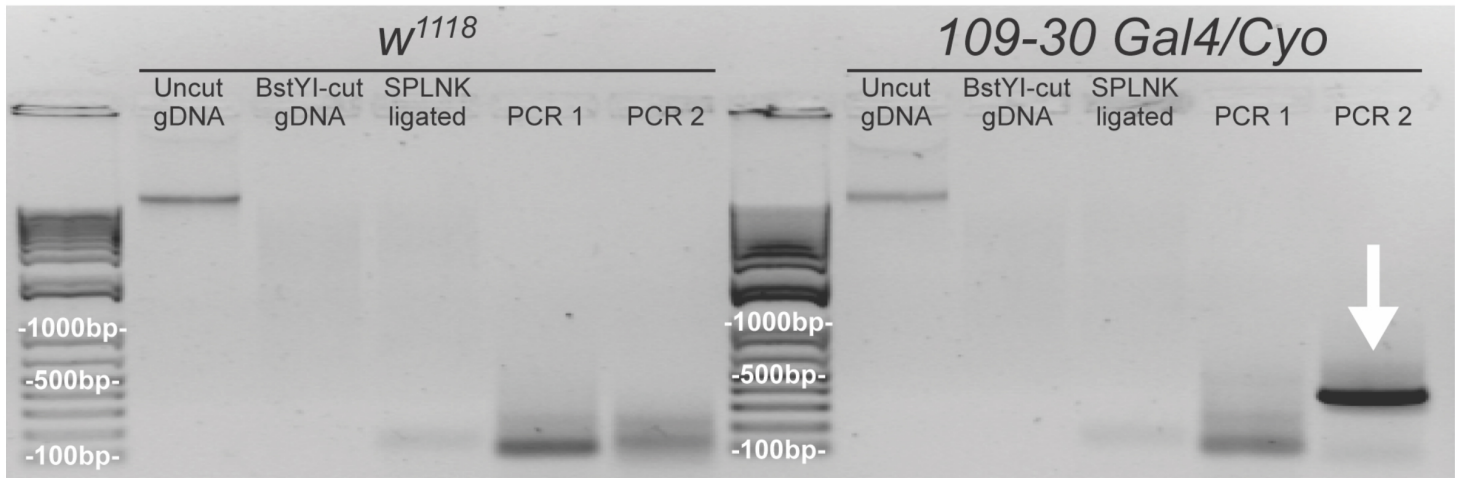

**Fig. S2. *109-30 Gal4* is sickie.** Splinkerette PCR rescued a 500bp fragment (white arrow) from *109-30 Gal4* flies, but not *w<sup>1118</sup>* flies, which lack a *Gal4* insertion. Sequencing revealed insertion in the sickie locus.

*TubGal80 FRT<sup>19A</sup> Flp<sup>122</sup>* ; *sick Gal4*  
*FRT<sup>19A</sup>* ; *UAS-CD8GFP*

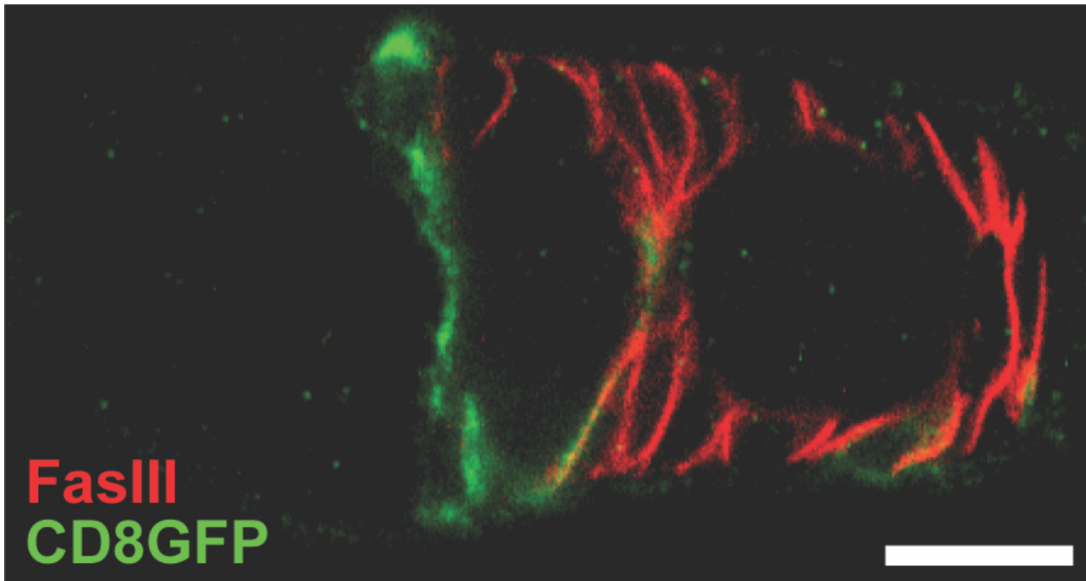

**Fig. S3. *sick Gal4* drives expression in FSC and progeny.** *sick<sup>M108398-TG4.0</sup>* drives CD8GFP (green) expression in the *109-30 Gal4* pattern. FasIII (red) marks follicle cells. Scale bar is 10  $\mu$ m.
